# Supplementary material for: One-pot synthesis of 2-thenoyltrifluoroacetone surface functionalised SrF2:Eu3+ nanoparticles: trace level detection of water
Source: Royal Society of Chemistry journal article supplement (doi:10.1039/c5ra08566g), 2015-01-01
Supplement: c5ra08566g1.pdf [file c5ra08566g1.pdf]

## Electronic Supporting information (ESI†)

### **One-pot Synthesis of 2-thenoyltrifluoroacetone Surface Functionalised SrF<sub>2</sub>:Eu<sup>3+</sup> Nanoparticles: Trace Level Detection of Water†**

Debasish Ghosh<sup>a</sup> and Meitram Niraj Luwang<sup>\*a,b</sup>

<sup>a</sup>*Chemical Engineering and Process Development Division, National Chemical Laboratory, Pune - 411008 (INDIA)*

<sup>b</sup>*Academy of Scientific and Innovative Research (AcSIR), Anusandhan Bhawan, Rafi Marg, New Delhi-110001, India*

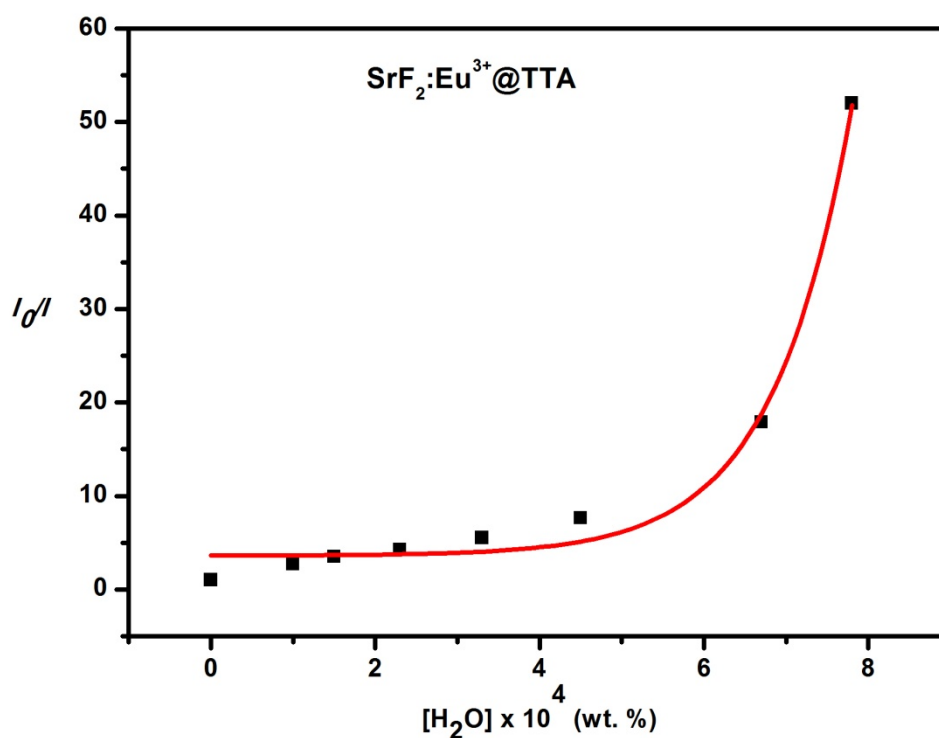

**Fig S1:** Stern-Volmer plot of I<sub>0</sub>/I vs [Q] of SrF<sub>2</sub>:Eu<sup>3+</sup>@TTA nanoparticles.

**Table S1:** Asymmetric ratio of the electric and magnetic dipole transition of the emission spectra of SrF<sub>2</sub>:Eu<sup>3+</sup>@TTA at different concentration of water in THF solvent.

| Sl. No. | Weight % of water in THF x 10 <sup>4</sup> | Integrated area                            |                                            | Asymmetric ratio, $I_{AS}$ ( $A_e/A_m$ ) |
|---------|--------------------------------------------|--------------------------------------------|--------------------------------------------|------------------------------------------|
|         |                                            | Magnetic dipole transition, $A_m$ (591 nm) | Electric dipole transition, $A_e$ (615 nm) |                                          |
| 1       | 0                                          | 383719                                     | 771277                                     | 2.01                                     |
| 2       | 1                                          | 145734                                     | 294703                                     | 2.02                                     |
| 3       | 1.5                                        | 109064                                     | 220432                                     | 2.02                                     |
| 4       | 2.3                                        | 88553                                      | 183399                                     | 2.07                                     |
| 5       | 3.3                                        | 69660                                      | 141583                                     | 2.03                                     |
| 6       | 4.5                                        | 55661                                      | 102804                                     | 1.84                                     |
| 7       | 6.7                                        | 21037                                      | 44308                                      | 2.10                                     |
| 8       | 7.8                                        | 7629                                       | 16949                                      | 2.22                                     |
